# Supplementary material for: Use of a biosynthetic intermediate to explore the chemical diversity of pseudo-natural fungal polyketides
Source: Springer Nature journal article supplement (doi:10.1038/nchem.2308), 2015-08-03
Supplement: 41557_2015_BFnchem2308_MOESM37_ESM.mol [file 41557_2015_BFnchem2308_MOESM37_ESM.mol]

  ChemDraw07091508572D

 31 34  0  0  0  0  0  0  0  0999 V2000
    1.4276    0.4122    0.0000 C   0  0  0  0  0  0  0  0  0  0  0  0
    0.7131    0.8247    0.0000 C   0  0  0  0  0  0  0  0  0  0  0  0
   -0.0014    0.4122    0.0000 C   0  0  0  0  0  0  0  0  0  0  0  0
   -0.7146    0.8240    0.0000 C   0  0  0  0  0  0  0  0  0  0  0  0
   -0.7146    1.6490    0.0000 C   0  0  0  0  0  0  0  0  0  0  0  0
   -1.4290    2.0615    0.0000 C   0  0  0  0  0  0  0  0  0  0  0  0
   -2.1435    1.6490    0.0000 C   0  0  0  0  0  0  0  0  0  0  0  0
   -2.1435    0.8240    0.0000 C   0  0  0  0  0  0  0  0  0  0  0  0
   -1.4290    0.4115    0.0000 C   0  0  0  0  0  0  0  0  0  0  0  0
   -2.8567    0.4122    0.0000 O   0  0  0  0  0  0  0  0  0  0  0  0
   -1.4290    2.8850    0.0000 O   0  0  0  0  0  0  0  0  0  0  0  0
    0.7131    1.6482    0.0000 N   0  0  0  0  0  0  0  0  0  0  0  0
   -0.0014    2.0607    0.0000 C   0  0  0  0  0  0  0  0  0  0  0  0
   -2.8567    2.0607    0.0000 C   0  0  0  0  0  0  0  0  0  0  0  0
   -0.0014   -0.4113    0.0000 C   0  0  0  0  0  0  0  0  0  0  0  0
    1.4276   -0.4113    0.0000 C   0  0  0  0  0  0  0  0  0  0  0  0
    0.7118   -0.8230    0.0000 C   0  0  0  0  0  0  0  0  0  0  0  0
    0.7118   -1.6488    0.0000 C   0  0  0  0  0  0  0  0  0  0  0  0
    1.4276   -2.0628    0.0000 C   0  0  0  0  0  0  0  0  0  0  0  0
    2.1433   -1.6488    0.0000 C   0  0  0  0  0  0  0  0  0  0  0  0
    2.1433   -0.8230    0.0000 C   0  0  0  0  0  0  0  0  0  0  0  0
   -0.0015   -2.0603    0.0000 O   0  0  0  0  0  0  0  0  0  0  0  0
    2.8567   -2.0603    0.0000 O   0  0  0  0  0  0  0  0  0  0  0  0
    2.8562   -0.4107    0.0000 C   0  0  0  0  0  0  0  0  0  0  0  0
    1.4276    1.2372    0.0000 C   0  0  0  0  0  0  0  0  0  0  0  0
   -0.7158   -0.0003    0.0000 H   0  0  0  0  0  0  0  0  0  0  0  0
    1.4276   -2.8850    0.0000 C   0  0  0  0  0  0  0  0  0  0  0  0
   -1.4290   -0.4107    0.0000 C   0  0  0  0  0  0  0  0  0  0  0  0
    2.1396    0.8233    0.0000 C   0  0  0  0  0  0  0  0  0  0  0  0
    2.8517    0.4122    0.0000 C   0  0  0  0  0  0  0  0  0  0  0  0
    2.1396    1.6456    0.0000 O   0  0  0  0  0  0  0  0  0  0  0  0
  2  1  1  0      
  3  2  1  0      
  3  4  1  0      
  4  5  1  0      
  5  6  2  0      
  6  7  1  0      
  7  8  2  0      
  8  9  1  0      
  9  4  2  0      
  8 10  1  0      
  6 11  1  0      
  2 12  1  0      
  5 13  1  0      
 13 12  1  0      
  7 14  1  0      
  3 15  1  0      
  1 16  1  0      
 15 17  1  0      
 17 16  2  0      
 17 18  1  0      
 18 19  2  0      
 19 20  1  0      
 20 21  2  0      
 21 16  1  0      
 18 22  1  0      
 20 23  1  0      
 21 24  1  0      
  2 25  1  1      
  3 26  1  1      
 19 27  1  0      
  9 28  1  0      
  1 29  1  1      
 29 30  1  0      
 29 31  2  0      
M  END
